# Supplementary material for: EPSTI1 Is Involved in IL‐28A‐Mediated Inhibition of HCV Infection
Source: Hindawi journal article supplement (doi:10.1155/2015/716315), 2015-01-01
Supplement: f1 [file 716315.f1.pdf]

## SUPPLEMENTARY FIGURES

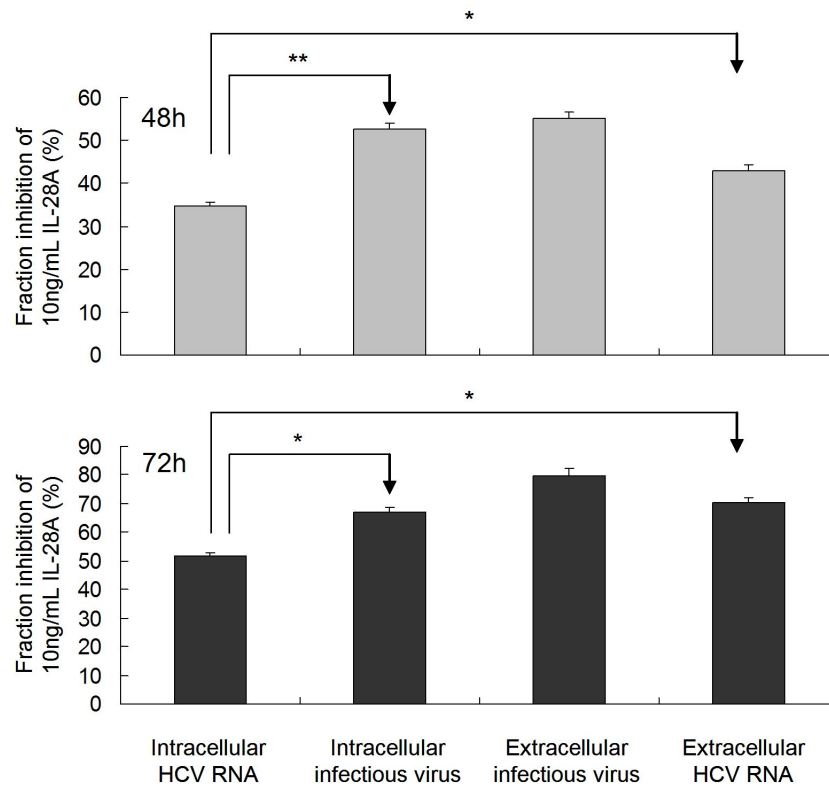

**Fig. S1. The inhibitory percentages of IL-28A.** Huh7.5 cells were infected with HCV (MOI=0.1) for 6h at 37°C. The medium was then removed and the cells were incubated with 10ng/mL IL-28A for 48h (upper) or 72h (lower). Intracellular and extracellular HCV RNA was detected by real-time PCR. Intracellular and extracellular infectious virus was detected by FFU (focus-forming unit) assay on naive Huh7.5 cells.

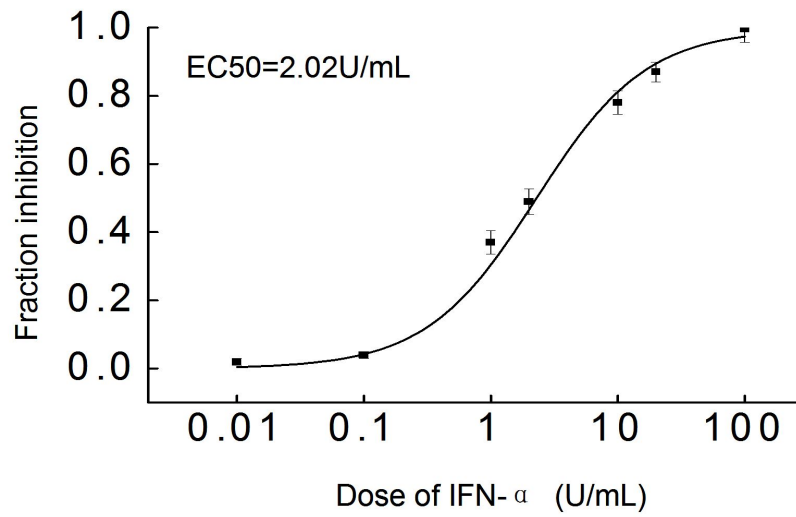

**Fig. S2. The EC<sub>50</sub> of IFN- $\alpha$  for inhibition of HCV RNA replication.** Huh7.5 cells were infected with HCV (MOI=0.1) for 6h at 37°C. The medium was then removed and the cells were incubated with different doses of IFN- $\alpha$  for 72h. Intracellular viral RNA was detected by real-time PCR. The results are the average of three independent experiments performed in triplicate.

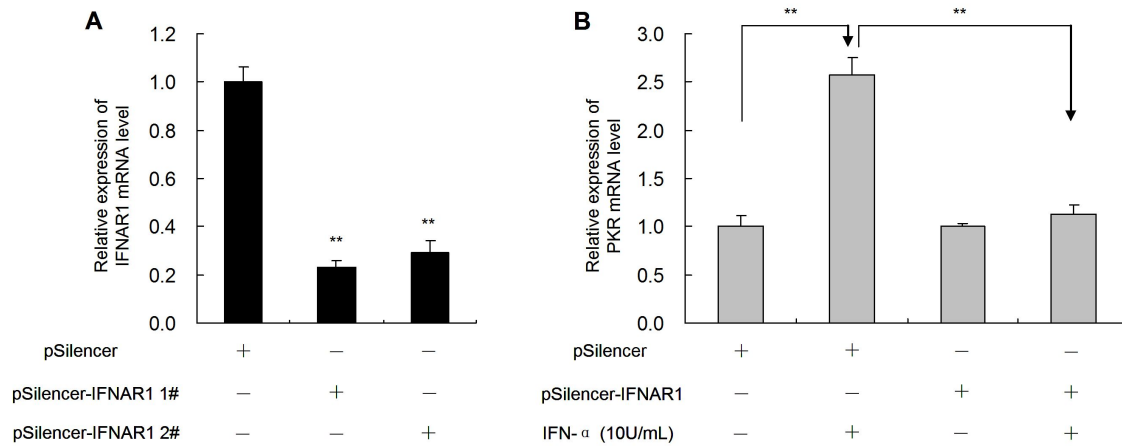

**Fig. S3. The effect of IFNAR1 knockdown.** (A) HLCZ01 cells were transfected with pSilencer vector or pSilencer-IFNAR1 1# or 2# for 48h. The expression of IFNAR1 was

measured by real-time PCR. (B) The cells were treated as described in part A followed by IFN- $\alpha$  (10U/mL) treatment for 12h. The expression of PKR was detected by real-time PCR.
